# Supplementary material for: Genetic Diversity, Pedigree Relationships, and A Haplotype-Based DNA Fingerprinting System of Red Bayberry Cultivars
Source: Front Plant Sci. 2020 Sep 9;11:563452. doi: 10.3389/fpls.2020.563452 (PMC7509436; doi:10.3389/fpls.2020.563452)
Supplement: Supplementary file 5 [file Table_1.xlsx]

## Sheet: Sheet1
Supplemental Table 1. Information on the 141 analyzed M. rubra accessions.
Accession name	Fruit color	Origin location	Genotype ID	Whether a cultivar	DNA mixture sequencing	No. of heterzygous segments on SEG1-19	No. of heterzygous SNPs on SEG1-19
Fenhongmei	purple	Yuyao, Zhejiang	1	Yes	Yes	9	29
Lizizhong	black	Wenzhou, Zhejiang	2	Yes	Yes	7	24
Dahongpao	red	Yuyao, Zhejiang	3	Yes	Yes	9	35
Xiaomuyemei	red	Huangyan, Zhejiang	4	Yes	No	9	30
Daye	red	Jingzhou, Hunan	5	Yes	No	5	23
Wenzumei	red	Jingzhou, Hunan	6	Yes	No	7	17
Zaohong	red	Fujian, Lianjiang	7	Yes	No	6	20
Xiaoyexidi	black	Wuhsien，Jiangsu	8	Yes	Yes	8	20
Dingaobian	red	Huangyan, Zhejiang	9	No	No	8	21
Unknown-1	black	Huangyan, Zhejiang	10	No	Yes	8	26
Ninghaishuijing	white	Huangyan, Zhejiang	11	No	No	7	17
J3	red	Huangyan, Zhejiang	12	No	No	5	17
Bendibaimei	white green	Huangyan, Zhejiang	13	Yes	No	8	20
Liyangtanmei	red	Huangyan, Zhejiang	14	Yes	No	6	12
Xiyemei	red	Jingzhou, Hunan	15	Yes	No	8	24
Yongjiabaiyangmei	white	Yongjia, Zhejiang	16	Yes	Yes	0	0
J2	red	Huangyan, Zhejiang	17	No	No	7	19
Yongjia2	red	Yongjia, Zhejiang	18	No	Yes	6	12
Dayexidi	red	Wuhsien，Jiangsu	19	Yes	Yes	5	17
Qiangbeimei	red	Jingzhou, Hunan	20	Yes	No	6	13
Tongshanmei	red	Huangyan, Zhejiang	21	Yes	No	8	17
Guangguizaomei	red	Jingzhou, Hunan	22	Yes	No	6	18
Dayemei	red	Jingzhou, Hunan	23	Yes	No	5	12
Linhai No.1	red	Jingzhou, Hunan	24	No	No	11	25
Tianwangzi	red	Jingzhou, Hunan	25	Yes	No	8	22
Chida	black	Yuyao, Zhejiang	26	Yes	Yes	6	14
Zhaojiahe	red	Huangyan, Zhejiang	27	Yes	Yes	7	20
Mudongguangye	red	Jingzhou, Hunan	28	Yes	No	7	21
Donglingwubian	black	Huangyan, Zhejiang	29	Yes	Yes	10	28
Niuwanzi	red purple	Wenzhou, Zhejiang	30	Yes	Yes	6	16
Goushimei	red	Fuzhou, Fujian	31	Yes	No	8	25
Longhaibaiyangmei	white	Fuzhou, Fujian	32	Yes	No	0	0
Yewu	black	Huangyan, Zhejiang	33	Yes	Yes	9	17
Shechongmei	red	Jingzhou, Hunan	34	Yes	No	4	7
Huangye	rellow red	Huangyan, Zhejiang	35	Yes	No	6	23
Xiongzhu	NA#	Huangyan, Zhejiang	36	Yes	Yes	5	20
Zhenzhumei	white	Tiantai, Zhejiang	37	Yes	No	7	21
Ribenruiyuan	red	Huangyan, Zhejiang	38	Yes	No	11	21
Jianyangdawu	black	Fuzhou, Fujian	39	Yes	No	8	17
Xianghong	purple	Huangyan, Zhejiang	40	Yes	No	6	20
Taipomei	red	Jingzhou, Hunan	41	Yes	No	5	14
Nicimeibian	red	Huangyan, Zhejiang	42	Yes	No	10	37
Dongguamei	red	Jingzhou, Hunan	43	Yes	No	9	32
Dayezhong	red	Fuzhou, Fujian	44	Yes	No	8	20
Yuelongsigukai	red	Huangyan, Zhejiang	45	Yes	No	14	38
Xiangshanwuzi	black	Xiangshan, Zhejiang	46	Yes	Yes	11	37
Dongkouwu	red	Fuzhou, Fujian	47	Yes	No	9	23
Xiaoyegaozhuang	red	Huangyan, Zhejiang	49	Yes	No	12	24
Heijing	black	Wenling, Zhejiang	A	Yes	Yes	6	14
Liushuitou2	NA	Wenzhou，Zhejiang	A	Yes	No	6	14
Taiyanzhong	red	Huangyan, Zhejiang	A	Yes	No	6	14
Dongkui	red	Huangyan, Zhejiang	B	Yes	Yes	5	15
Damingzhu	red	Yuyao, Zhejiang	B	Yes	Yes	5	15
DB2	violet black	Huangyan, Zhejiang	B	Yes	Yes	5	15
DB1	violet black	Huangyan, Zhejiang	B	Yes	Yes	5	15
Nidongbai	white	Huangyan, Zhejiang	B	Yes	Yes	5	15
Ruixu	red	Yuyao, Zhejiang	B	Yes	Yes	5	15
Zaoshenganhai	black	Long hai, Fujian	B	Yes	Yes	5	15
DK8	red	Huangyan, Zhejiang	B	No	No	5	15
DK13	red	Huangyan, Zhejiang	B	No	No	5	15
DK16	red	Huangyan, Zhejiang	B	No	No	5	15
DK18	red	Huangyan, Zhejiang	B	No	No	5	15
No.52	red	Fuzhou, Fujian	B	Yes	No	5	15
DK2	red	Fuzhou, Fujian	B	No	No	5	15
Lizhimei	red	Huangyan, Zhejiang	B	Yes	No	5	15
Dingaomei	red	Wenzhou, Zhejiang	C	Yes	Yes	9	26
Miaoyanzhong	black	Wenzhou, Zhejiang	C	Yes	Yes	9	26
J1	red	Huangyan, Zhejiang	C	No	No	9	26
J10	white	Huangyan, Zhejiang	C	No	No	9	26
Nidingaobian	red	Huangyan, Zhejiang	C	Yes	No	9	26
Tuda	red	Huangyan, Zhejiang	C	Yes	No	9	26
Dayegaozhuang	red	Wenzhou, Zhejiang	D	Yes	Yes	11	30
Shizhutuzhong	purple	Wenzhou, Zhejiang	D	Yes	Yes	11	30
Xiyegaozhuang	black	Wenzhou, Zhejiang	D	Yes	Yes	11	30
Yingsi	black	Longhai, Fujian	E	Yes	Yes	10	43
Wangzianhai	red	Fuzhou, Fujian	E	Yes	Yes	10	43
Ruansianhaibian	red	Fuzhou, Fujian	E	Yes	No	10	43
Zaomei	red	Jingzhou, Hunan	E	Yes	No	10	43
Biqi	black	Yuyao, Zhejiang	F	Yes	Yes	7	23
Heigaofeng	black	Tiantai, Zhejiang	F	Yes	No	7	23
Zaoqi	red	Jingzhou, Hunan	F	Yes	No	7	23
Sanxiaaowumei	black	Huangyan, Zhejiang	F	Yes	No	7	23
Chouyemei	red	Huangyan, Zhejiang	F	Yes	No	7	23
Guangdongdahei	black	Huangyan, Zhejiang	F	Yes	No	7	23
Damuyemei	red	Huangyan, Zhejiang	F	Yes	No	7	23
Aoheiximiye	red	Huangyan, Zhejiang	F	Yes	No	7	23
Cimei	red	Huangyan, Zhejiang	F	Yes	No	7	23
Daji	red	Huangyan, Zhejiang	F	Yes	No	7	23
Taohong	purple	Huangyan, Zhejiang	F	Yes	No	7	23
Aolishuimei	red	Huangyan, Zhejiang	F	Yes	No	7	23
Liushuitou	red	Huangyan, Zhejiang	F	Yes	Yes	7	23
Haochimei	red	Huangyan, Zhejiang	F	Yes	No	7	23
Jinqiantanmei	black	Huangyan, Zhejiang	F	Yes	No	7	23
Songmaoli	purple	Huangyan, Zhejiang	F	Yes	No	7	23
Wuziyangmei	black	Xiangshan, Zhejiang	F	Yes	No	7	23
Hezhaizao	red	NA	F	Yes	No	7	23
Linhaizaodamei	black	Linhai, Zhejiang	G	Yes	Yes	9	30
Tongzimei	black	Sanmen, Zhejiang	G	Yes	Yes	9	30
Lanxibiqibianyi	black	Lanxi, Zhejiang	H	Yes	Yes	4	15
Unknown-5	black	Huangyan, Zhejiang	H	No	Yes	4	15
Xiangshandazhong	red	Huangyan, Zhejiang	I	Yes	No	6	12
Mudongdaye	black	Jingzhou, Hunan	I	Yes	No	6	12
Linhaishuimei	black	Linhai, Zhejiang	J	Yes	Yes	5	16
Ruansi	black	Longhai, Fujian	J	Yes	Yes	5	16
Yuanqiaoshuimei	red	Huangyan, Zhejiang	J	Yes	Yes	5	16
Liuyemei	black	Lanxi, Zhejiang	K	Yes	Yes	7	19
Guangdongwuximei	red	Huangyan, Zhejiang	K	Yes	No	7	19
Dahuangye	red	Huangyan, Zhejiang	L	Yes	No	8	23
J5	red	Huangyan, Zhejiang	L	No	No	8	23
Xiaoji	red	Huangyan, Zhejiang	M	Yes	No	11	23
Xiaojing	red	Jingzhou, Hunan	M	Yes	No	11	23
Yuelipan	red	Jingzhou, Hunan	N	Yes	No	10	31
Wudamei	black	Jingzhou, Hunan	N	Yes	No	10	31
Dayeqing	purple	Huangyan, Zhejiang	O	Yes	No	10	26
Xiazhihong	red	Yuyao, Zhejiang	O	Yes	Yes	10	26
Shenhongzhong	red	Jingzhou, Hunan	O	Yes	No	10	26
Chise	purple	Hunan, Jingzhou	O	Yes	No	10	26
Tumeier	red	Huangyan, Zhejiang	O	Yes	No	10	26
Huangbaimei	purple	Wenzhou, Zhejiang	P	Yes	Yes	7	19
Wannianqing	red	Wenzhou, Zhejiang	P	Yes	Yes	7	19
Guiyuanmei	red	Huangyan, Zhejiang	P	Yes	No	7	19
Wandaomei	black	Zhoushan, Zhejiang	Q	Yes	Yes	8	25
Wanqi	black	Yuyao, Zhejiang	Q	Yes	Yes	8	25
Qingye	red	Huangyan, Zhejiang	R	Yes	No	8	19
Zaose	purple	Jingzhou, Hunan	R	Yes	No	8	19
Dongaozaomei	black	Huangyan, Zhejiang	S	Yes	Yes	7	28
Unknown-4	black	Huangyan, Zhejiang	S	No	Yes	7	28
Huaaobaimei	white	Jingzhou, Hunan	T	Yes	No	8	26
Unknown-2	black	Huangyan, Zhejiang	T	No	Yes	8	26
Niukoumei	red	Jingzhou, Hunan	T	Yes	No	8	26
Heiruilin	black	Fuzhou, Fujian	U	Yes	Yes	7	23
Muyemei	black	Lanxi, Zhejiang	U	Yes	Yes	7	23
Yingsianhaibian	red	Fuzhou, Fujian	U	Yes	No	7	23
Shangyubai	white	Shangyu，Zhejiang	V	Yes	Yes	5	13
Unknown-6	white red	Huangyan, Zhejiang	V	No	No	5	13
Unknown-7	white red	Huangyan, Zhejiang	V	No	No	5	13
Layangmei	red	Huangyan, Zhejiang	V	Yes	No	5	13
Baiyanmei	white	Jingzhou, Hunan	V	Yes	No	5	13
Shanyangmei	red	Wenzhou, Zhejiang	W	Yes	Yes	8	16
Tezaomei	red	Huangyan, Zhejiang	W	Yes	No	8	16
# NA means not available. The representative cultivar of each duplicated genotype ID is first cultivar listed.
