# Supplementary material for: Genetic Diversity, Pedigree Relationships, and A Haplotype-Based DNA Fingerprinting System of Red Bayberry Cultivars
Source: Front Plant Sci. 2020 Sep 9;11:563452. doi: 10.3389/fpls.2020.563452 (PMC7509436; doi:10.3389/fpls.2020.563452)
Supplement: Supplementary file 6 [file Table_2.xlsx]

## Sheet: Sheet1
Supplemental Table 2. Quality assessment of 'Linhaizaodamei' genome assemblies using different kmer sizes.
Kmer size	77	79#	81
Number of contigs	26887	26692	49261
Number of contigs (>= 1000 bp)	26887	26692	49261
Number of contigs (>= 5000 bp)	11112	11068	9058
Number of contigs (>= 10000 bp)	9635	9629	6340
Number of contigs (>= 25000 bp)	3116	3209	2031
Number of contigs (>= 50000 bp)	1233	1282	643
Largest contig	501709	638757	304090
Total length	308682970	312501334	253214166
Total length (>= 1000 bp)	308682970	312501334	253214166
Total length (>= 5000 bp)	278244385	282372183	179110275
Total length (>= 10000 bp)	268231600	272587318	160192339
Total length (>= 25000 bp)	174684172	181246365	97345496
Total length (>= 50000 bp)	108278811	113078095	48615490
N50	31629	32549	14933
N75	12044	12167	3674
L50	2407	2355	3468
L75	6276	6151	11600
GC (%)	38.7	38.65	38.73
# The assembly obtained using Kmer 79 had the highest quality and was used for segment selection in this study.
