# Supplementary material for: Genetic Diversity, Pedigree Relationships, and A Haplotype-Based DNA Fingerprinting System of Red Bayberry Cultivars
Source: Front Plant Sci. 2020 Sep 9;11:563452. doi: 10.3389/fpls.2020.563452 (PMC7509436; doi:10.3389/fpls.2020.563452)
Supplement: Supplementary file 8 [file Table_4.xlsx]

## Sheet: Sheet1
Supplementa Table 4. PI, Pipar/off , and Pisibs for each of the 72 genotypes.
Genotype ID	PI	PIpar/off	PIsib
1	1.409e-11	3.329e-06	0.0001016
2	3.564e-11	6.253e-06	0.0001879
3	1.738e-13	2.782e-07	9.736e-05
4	7.416e-19	4.983e-10	1.169e-05
5	3.789e-11	6.307e-06	0.0002552
6	9.451e-18	8.019e-08	2.465e-05
7	3.83e-14	2.773e-07	9.565e-05
8	1.305e-14	3.496e-07	4.953e-05
9	2.568e-10	7.329e-06	0.0002057
10	2.63e-09	1.626e-05	0.0003136
11	2.205e-12	3.6e-06	0.0001268
12	4.677e-11	4.577e-06	0.0001939
13	1.657e-13	3.034e-06	8.837e-05
14	2.099e-10	9.354e-06	0.0002545
15	4.177e-14	2.356e-07	4.951e-05
16	4.573e-10	2.138e-05	0.00062
17	1.335e-11	6.714e-06	0.0001315
18	9.457e-13	4.079e-06	0.000187
19	4.042e-12	1.017e-06	0.0001831
20	2.324e-14	1.153e-06	0.0001233
21	4.426e-14	5.724e-07	5.395e-05
22	1.416e-11	5.31e-06	0.0001304
23	1.969e-09	2.919e-05	0.0003603
24	2.019e-14	5.565e-07	2.343e-05
25	8.511e-12	7.772e-06	0.0001532
26	6.729e-13	3.324e-06	0.0001156
27	4.172e-13	8.203e-07	0.0001014
28	2.275e-15	2.153e-07	5.699e-05
29	1.699e-14	5.103e-07	4.545e-05
30	1.382e-13	1.813e-07	0.0001033
31	7.455e-12	1.814e-06	9.422e-05
32	2.146e-09	4.632e-05	0.0005447
33	6.383e-14	3.733e-06	7.441e-05
34	3.292e-12	1.626e-06	0.0002824
35	5.848e-12	1.174e-06	0.0001465
36	2.542e-10	3.634e-05	0.0004384
37	9.103e-11	8.018e-06	0.0001902
38	1.012e-18	2.135e-08	9e-06
39	6.33e-20	7.043e-10	1.224e-05
40	2.382e-17	6.7e-09	1.531e-05
41	3.043e-16	2.211e-08	2.575e-05
42	2.761e-43	5.168e-22	7.048e-09
43	2.674e-16	1.785e-07	1.57e-05
44	1.689e-15	7.623e-08	1.437e-05
45	3.62e-19	7.965e-09	3.07e-06
46	8.331e-17	3.527e-07	2.344e-05
47	1.52e-16	2.436e-07	1.204e-05
48	1.523e-16	4.489e-08	1.807e-05
49	8.335e-21	1.423e-09	4.466e-06
A	1.089e-11	3.648e-06	0.0001592
B	1.587e-11	6.843e-06	0.0001786
C	7.865e-11	4.226e-06	0.0001358
D	2.35e-13	1.213e-06	4.513e-05
E	1.549e-14	2.197e-07	2.255e-05
F	2.581e-10	6.924e-06	0.0002185
G	1.006e-13	2.072e-06	6.383e-05
H	1.445e-08	3.778e-05	0.0006466
I	4.578e-17	1.372e-07	2.406e-05
J	2.676e-07	0.000106	0.001081
K	4.104e-16	3.13e-08	1.952e-05
L	2.902e-12	1.42e-06	8.721e-05
M	4.624e-17	6.788e-08	1.146e-05
N	6.015e-15	3.642e-07	3.398e-05
O	2.446e-17	6.51e-08	1.713e-05
P	5.013e-13	1.063e-06	7.738e-05
Q	1.225e-14	1.102e-06	5.843e-05
R	4.024e-13	8.735e-07	5.832e-05
S	2.295e-14	1.634e-06	5.442e-05
T	1.192e-14	3.824e-07	3.813e-05
U	1.337e-12	8.285e-07	8.042e-05
V	3.657e-19	2.392e-09	9.227e-06
W	9.231e-16	1.262e-07	2.953e-05
PI is the probability of the genotype identitical to a random individual; PIpar/off is the probability of identity between the genotype and its parents or offsprings; and PIsib is the probability of identity between the genotype and its siblings sharing both parents;
