# Supplementary material for: Genetic Diversity, Pedigree Relationships, and A Haplotype-Based DNA Fingerprinting System of Red Bayberry Cultivars
Source: Front Plant Sci. 2020 Sep 9;11:563452. doi: 10.3389/fpls.2020.563452 (PMC7509436; doi:10.3389/fpls.2020.563452)
Supplement: Supplementary file 9 [file Table_5.xlsx]

## Sheet: Sheet1
Supplemental Table 5. Primers designed for amplifying SEG1-19.
Segment ID	Forward primer	Reverse primer	Forward / Reverse Tm (°C)
SEG1	ACATGCTTTCTCCCTCATGG	GGCAGTGCAGATGAGATGAA	60.07 / 59.95
SEG2	GTTTCGCTCCAAGAATCGAG	CAAACAGCATTGGTGTGGTC	59.96 / 60.01
SEG3	CTCTCAAAGGGTTGCACACA	GCTGTGACCTCGGATGATTT	59.87 / 60.08
SEG5	AAGTGAGCTGAGGCCACAAT	AGCTGATACCGGAGGAGGAT	59.87 / 60.06
SEG5	ATTCCCACCAACGTCTCTTG	TAGCCAAGCAATGGAAGAGG	59.97 / 60.34
SEG6	CACCCACATTGTTCCCCTAC	CGAAGCTGTTGAGGGGTTAG	60.09 / 59.87
SEG7	GAGATGTTGATGCCGTCTGA	ATGGCTTCCGCAATTATGTC	59.79 / 59.93
SEG8	CAGCAAGGGAGTCATCCAAT	GGTCTGCCAGTATGCACTGA	60.07 / 59.86
SEG9	CGCTTTTAGCCATGGTGTTT	ACTCACTGTCGAGGGTTGCT	60.13 / 59.91
SEG10	TTCTGCATGAACCCATTCAA	TCCTGGGCTTGAAGAAGCTA	60.05 / 60.09
SEG11	AGTGACATCTTTGGGGAACG	CCAGCAGTGAAAGGACACAA	59.97 / 59.87
SEG12	TAACCGAGTCGTGGAAAAGC	ATGACTCGCGTCTGTTGTTG	60.25 / 59.90
SEG13	ATTCGACACCTTGGTTTTGC	ATGGCCACAATTGTACAGCA	59.98 / 60.00
SEG14	CAGCAATCGGTAACAGCTCA	ACTCCTAGCCGCCCTGTATT	60.01 / 60.12
SEG15	AAGCGGGAATCAGACAGAGA	ACGTTTTCACCCGCACTAAC	59.95 / 60.04
SEG16	TGATGGTCCACTGCGATAAA	TCCCAGACAGAGAGCCAGTT	60.07 / 59.99
SEG17	TGTGAGGTACGAGCATCAGC	GCCATGCCTCGTTTGTTATT	60.02 / 59.97
SEG18	AAGCATACCGGACGAGAAGA	AATTTTGCCTGCAAGTCACC	59.84 / 60.12
SEG19	CCACATTGACCTTTCCTGCT	CATTCGTGTGGGTGGATATG	60.11 / 59.65
